# Supplementary material
Source: HighWire-hosted journal article supplement (https://jcp.bmj.com/highwire/filestream/198930/field_highwire_adjunct_files/0/jcp-2023-208987supp001_data_supplement.pdf)
Supplement: jcp-2023-208987supp001_data_supplement.pdf [file jcp-2023-208987supp001_data_supplement.pdf]

**Supplementary Table 1. Clinicopathological features of patients with NPC (491 cases)**

| <b>Patients features</b>                   | <b>No. of patients (%)</b> |
|--------------------------------------------|----------------------------|
| <b>NPC patients</b>                        |                            |
| <b>Gender</b>                              |                            |
| Male                                       | 356 (71.34)                |
| Female                                     | 143 (28.66)                |
| <b>Age</b>                                 |                            |
| ≤45                                        | 143 (29.12)                |
| >45                                        | 348 (70.88)                |
| <b>Clinical stages</b>                     |                            |
| I                                          | 5 (1.01)                   |
| II                                         | 60 (12.22)                 |
| III                                        | 239 (48.68)                |
| IV                                         | 187 (38.09)                |
| <b>T stage</b>                             |                            |
| T1 and T2                                  | 215 (43.79)                |
| T3 and T4                                  | 276(56.21)                 |
| <b>N stage</b>                             |                            |
| N0                                         | 58 (11.81)                 |
| N1/2/3                                     | 433 (88.19)                |
| <b>M stage</b>                             |                            |
| M0                                         | 454 (92.46)                |
| M1                                         | 37 (7.54)                  |
| <b>Noncancerous nasopharyngeal tissues</b> |                            |
| <b>Gender</b>                              |                            |
| Male                                       | 35 (70.0)                  |
| Female                                     | 15 (30.0)                  |
| <b>Age</b>                                 |                            |
| ≤45                                        | 16 (32.0)                  |
| >45                                        | 34 (68.0)                  |
